# Supplementary material for: Non-alcoholic fatty liver disease associated with gallstones in females rather than males: a longitudinal cohort study in Chinese urban population
Source: PubMed Central journal article supplement (PMC4273434; doi:10.1186/s12876-014-0213-y), 2014-12-13

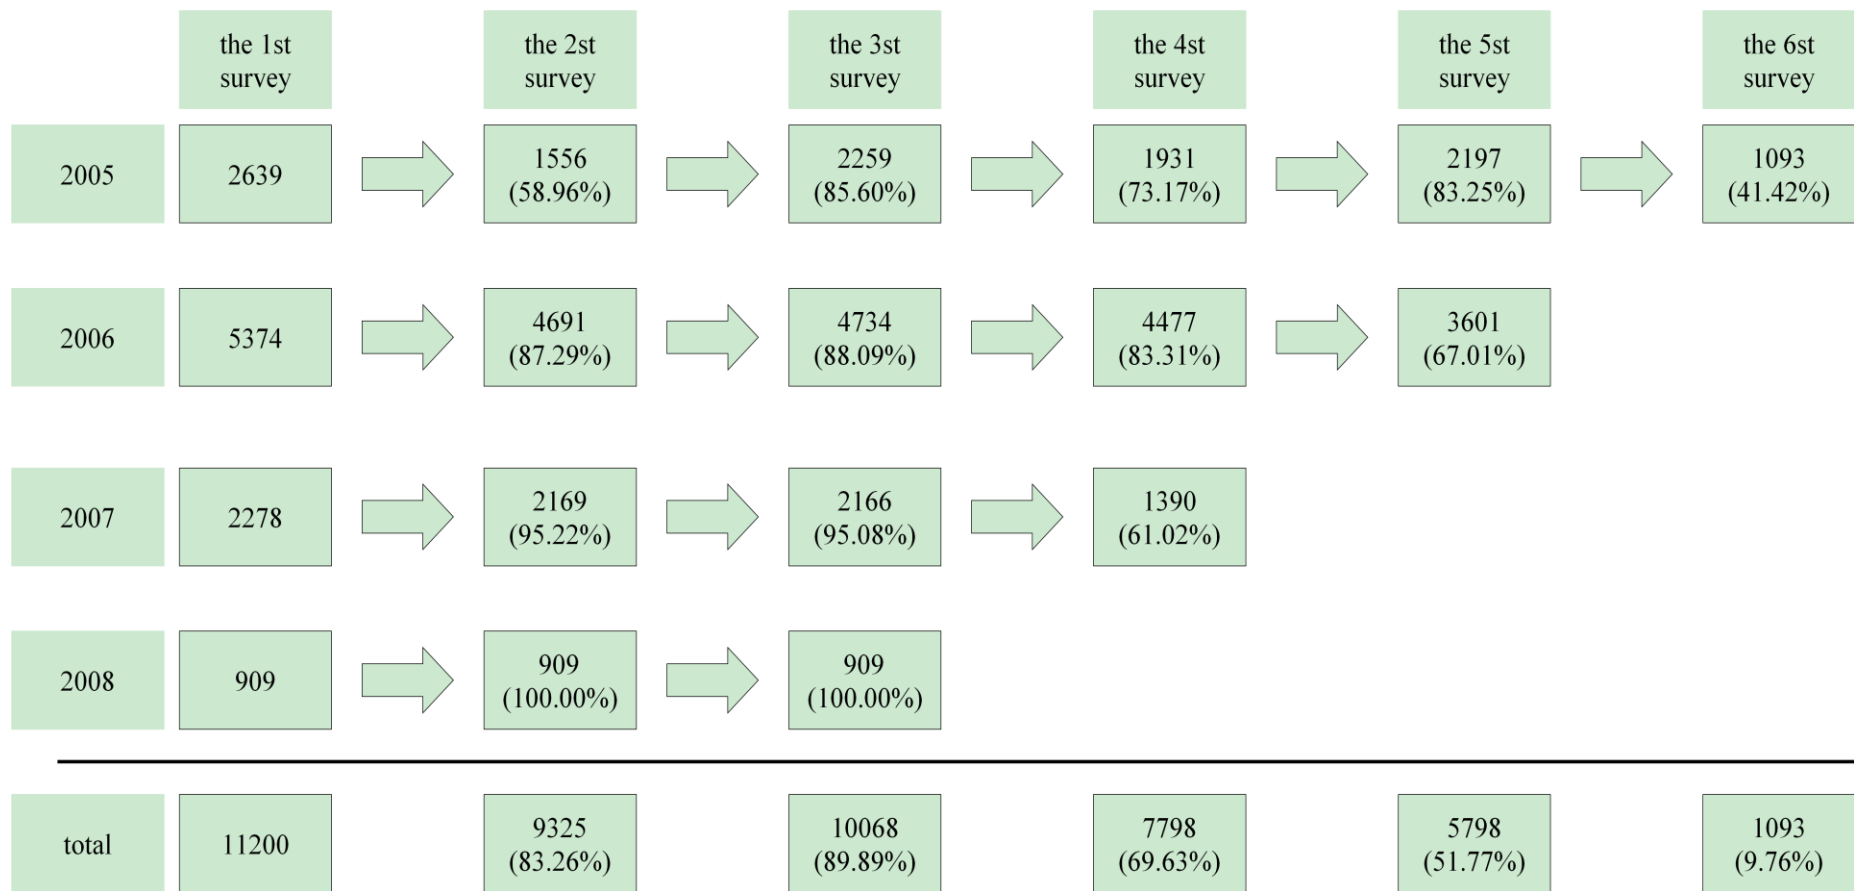

Supplement: 12876_2014_213_MOESM1_ESM.pdf [file 12876_2014_213_MOESM1_ESM.pdf]
